# Supplementary material
Source: PubMed Central journal article supplement (PMC3837879)
Supplement: AAC.00699-13_zac012132365so1.pdf [file AAC.00699-13_zac012132365so1.pdf]

**A**

|          |   |                                                                                                 |
|----------|---|-------------------------------------------------------------------------------------------------|
| SmanFPPS | 1 |                                                                                                 |
| DmelFPPS | 1 | M F K L A R M L L P Q Q R I L A S P L R L Q R L I S T S D E V N A E P I I K S M D T I G G L P T |
| DrerFPPS | 1 |                                                                                                 |
| HsapFPPS | 1 | M P L S R W L R S V G V F L L P A P Y W A P R E R W L G S L R R P S L V H G Y P V L A W H S A   |
| PvivFPPS | 1 |                                                                                                 |
| TbruFPPS | 1 |                                                                                                 |
| XlaeFPPS | 1 |                                                                                                 |

|          |    |                                                                                                     |
|----------|----|-----------------------------------------------------------------------------------------------------|
| SmanFPPS | 1  |                                                                                                     |
| DmelFPPS | 49 | E L V N E Q K L K K T S R T L S T L Q N H S V P I A A R V T V S K D E S R D F M A V F F P D L V V R |
| DrerFPPS | 1  |                                                                                                     |
| HsapFPPS | 48 | R C W C Q A W T E E P R A L C S S L R M N G D . . . Q N S D V Y A Q E K Q D F V Q H F S Q I V R     |
| PvivFPPS | 1  |                                                                                                     |
| TbruFPPS | 1  |                                                                                                     |
| XlaeFPPS | 1  |                                                                                                     |

|          |    |                                                                                                   |
|----------|----|---------------------------------------------------------------------------------------------------|
| SmanFPPS | 27 | L L R H V H P K S . . . L E L A E Q H F Q N V T S Y N L S S G K R I R G V L V V L S Y M V F S N K |
| DmelFPPS | 97 | D I T T V T K A Y . N C S D A A K W F A Q V L Q Y N V P R G K K N R G I L T V L T Y K N L V P T   |
| DrerFPPS | 33 | E L T E Q D F T D P V L S D A L N R L R E V L Q Y N A P G G K R N R G L S V I G S L R E L V S P   |
| HsapFPPS | 93 | V L T E D E M G H P E I G D A I A R L K E V L E Y N A I G G K Y N R G L T V V V A F R E L V E P   |
| PvivFPPS | 30 | H L N E Y S L E E E I K E H I S K Y Y K L L F D Y N C L G G K N N R G I L V I L I Y E Y V K N R   |
| TbruFPPS | 17 | L L E E L E L K F D M D P N R V R Y L R K M M D T T C L G G K Y N R G L T V I D V A E S L L S L   |
| XlaeFPPS | 22 | D L A A E D S G H P E V G D A I G R L K E V L O Y N T L G G K C N R G V T V L A S Y R E L L G P   |

**FARM**

|          |     |                                                                                                 |
|----------|-----|-------------------------------------------------------------------------------------------------|
| SmanFPPS | 73  | N E N S R K N . . . . . L S C V Y L I G W C V E L L H A G F L V L D D I I D N S T L R           |
| DmelFPPS | 144 | Q D L T P E N . . . . . I K L A Q Y L G W C V E M L Q S F F I I S D D V M D N S T T R           |
| DrerFPPS | 81  | S E L P T E E . . . . . V H R A L L V G W C I E L L Q A F F L V A D D I M D S S V T T R         |
| HsapFPPS | 141 | R K Q D A D S . . . . . L Q R A W T V G W C V E L L Q A F F L V A D D I M D S S L T T R         |
| PvivFPPS | 78  | D I N S S E . . . . . W E K A A C L A W C I E I L Q A A F L V A D D I M D K G E T T R           |
| TbruFPPS | 65  | S P N N N G E E D D G A R R K R V L H D A C V C G W M I E F L Q A H Y L V E D D I M D N S V T R |
| XlaeFPPS | 70  | E L H K D G N . . . . . L Q R A L A V G W C V E L L Q A F F L V A D D I M D N S V T R           |

|          |     |                                                                                                   |
|----------|-----|---------------------------------------------------------------------------------------------------|
| SmanFPPS | 111 | R G Q P C W H C T Q I D S N R G L I G V N D G L H L I L S S K Y L I H S L F A E N Q S D V D S Y   |
| DmelFPPS | 182 | R G Q P C W H K . . . V E N V G L T . A I N D A L M I E N A M Y A I L K K H F S H L D . . . . .   |
| DrerFPPS | 119 | R G Q P C W Y K . . . K E A I G L D . A I N D A F L L E G S I Y R L L R R H C R G Q P . . . . .   |
| HsapFPPS | 179 | R G Q J C W Y Q . . . K P G V G L D . A I N D A N L L E A C I Y R L L K E Y C R E Q P . . . . .   |
| PvivFPPS | 115 | R N K Y C W Y L . . . L K D V E T K N A V N D V L L L Y N S I Y K M L I E I Y L R N E S . . . . . |
| TbruFPPS | 113 | R G K P C W Y R . . . H P G V T V Q C A I N D G L L L K S W T H M M A M H F F A D R P . . . . .   |
| XlaeFPPS | 108 | R G Q P C W Y R . . . K E G I G L D . A V N D S F L L E A C I Y R I L R K Y C R G K P . . . . .   |

|          |     |                                                                                                 |
|----------|-----|-------------------------------------------------------------------------------------------------|
| SmanFPPS | 159 | S W K D K N N V Y L K L C K L F D E I S Y K T C S G Q C L D V L S S N P N . . . . . N Q C I L D |
| DmelFPPS | 221 | . . . . . C Y V A L M E L F H E I T Y I T T C G Q S L D Q L N S . . . . .                       |
| DrerFPPS | 158 | . . . . . Y Y V H L L E L F T E S F Q T E L G Q A L D L M T A P P H . . . . .                   |
| HsapFPPS | 218 | . . . . . Y Y L N L I E L F L Q S S Y Q T E I G Q T L D L L T A P Q G . . . . .                 |
| PvivFPPS | 155 | . . . . . C Y V D V I A T F R D A T L K T I I G Q H L D T N I F S D K Y S D A H R E I D V N     |
| TbruFPPS | 153 | . . . . . F L Q D L L C R F N R V D Y T T A V G Q L Y D V T S M F D S . . . . . N K L           |
| XlaeFPPS | 147 | . . . . . Y Y L S L L E L F L E T S Y Q T E L G Q A L D L L I T A Q P G . . . . .               |

|          |     |                                                                                                 |
|----------|-----|-------------------------------------------------------------------------------------------------|
| SmanFPPS | 202 | R K Q N N L E F D S F T R N Y S P D V F E A I T H W K T G F Y T F Y L P V A C G M I L A E V D T |
| DmelFPPS | 248 | . . . . . N R C V S E F T M E N Y K A I V E N K T A Y Y S F Y L P F A A L A L H L A G Y K D     |
| DrerFPPS | 188 | . . . . . K I D L N R F T M E R Y K A I V K Y K T A F Y S F Y L P V A A A M Y M A G I E N       |
| HsapFPPS | 248 | . . . . . N V D L V R F T E K R Y K S I V K Y K T A F Y S F Y L P I A A A M Y M A G I D G       |
| PvivFPPS | 196 | N I N V P E Q P V I N I M I N F G V Y K N I V I H K T A Y Y S F F L P I V C G M L L A G I A V   |
| TbruFPPS | 186 | D P D V S Q P T T D A E F T L S N Y K R I V K Y K T A Y Y T Y L L P L V M G L L I V S . E A L   |
| XlaeFPPS | 177 | . . . . . K V D L N R Y T E K R Y K A I V K Y K T A Y Y S F Y L P V A A A M Y M A G I D G       |

**SARM**

|          |     |                                                                                                 |
|----------|-----|-------------------------------------------------------------------------------------------------|
| SmanFPPS | 250 | D . D I F K S V Q H I L L K L G N Y F Q A Q D D Y L D C F G D S E I T G K V G T D I A E G K C T |
| DmelFPPS | 288 | A . E A F R Q S K T I L L E M G N F F Q V Q D D F L D C F G N P E V T G K I G T D I Q D N K C S |
| DrerFPPS | 228 | E . I E H H N A K T I L L E M G E F F Q I Q D D Y L D C F G D P A V T G K I G T D I Q D N K C S |
| HsapFPPS | 288 | E . K E H A N A K K I L L E M G E F F Q I Q D D Y L D L F G D P S V T G K I G T D I Q D N K C S |
| PvivFPPS | 244 | D N L I Y K K I E D I S M L M G E Y F Q I H D D Y L D I F G D S T K T G K V G S D I Q N N K L T |
| TbruFPPS | 233 | P T V D M G V T E E L A M L M G E Y F Q V Q D D V M D C F T P P E R L G K V G T D I Q D A K C S |
| XlaeFPPS | 217 | E . E E H K N A K T I L L E M G E F F Q I Q D D Y L D C Y G D P S V T G K I G T D I Q D N K C G |

|          |     |                                                                                                 |
|----------|-----|-------------------------------------------------------------------------------------------------|
| SmanFPPS | 297 | W L I V E A L K Y L S P E Q Y E I L K T N Y G K P D L K S Q Q T V R N L Y D T I K L P E K Y H L |
| DmelFPPS | 335 | W L A V V A M Q R A N V E Q K Q I M V D C Y G K E E P A K V E R V K E L Y K E L G L P S T Y A I |
| DrerFPPS | 275 | W L V V T A L G I M T P E Q R A E L E A C Y G R S D A E S V E R V K A L Y D T L E M P M R Y H Q |
| HsapFPPS | 335 | W L V V Q C L Q R A T P E Q Y Q I L K E N Y G Q K E A E K V A R V K A L Y E E L D L P A V F L Q |
| PvivFPPS | 292 | W P L I K T F E L C S E P D K I K I V K N Y G K N N L A C V K V I D S L Y E Q Y K I R K H Y E S |
| TbruFPPS | 281 | W L A V T F L A K A S S A Q V A E F K A N Y G S G D S E K V A T V R R L Y E E A D L Q G D Y V A |
| XlaeFPPS | 264 | W L V V E A L K R V S P E Q R Q V L E E N Y G R D E P D K V H R V K Q L Y D E L D M A A V Y Q R |

|          |     |                                                                                         |
|----------|-----|-----------------------------------------------------------------------------------------|
| SmanFPPS | 339 | Y E E Q T K S E I M I T I Q K F T Y L D H F S F D P R D L F T F L V E L L F Q R A C     |
| DmelFPPS | 377 | F E E E S Y N M I K T H I Q Q T S R G V P . . . . H Q T F L Q I L N K I Y Q R R D S     |
| DrerFPPS | 317 | Y E E E S Y H R L Q M L I Q L H A K N L P . . . . H A V F L N F A K K I Y K R R K       |
| HsapFPPS | 377 | Y E E D S Y S H I X K L I E Q Y A A N P L . . . . P A V F L G L A R K I Y K R R K       |
| PvivFPPS | 334 | Y E K A Q K A K I L S A I N . . . E L H H E G . . . . I E Y V L K Y L L E I L F T G V . |
| TbruFPPS | 323 | Y E A A V A E Q V K E L I E K L R L C S P G . . . . F A A S V E T L W G K T Y K R Q K   |
| XlaeFPPS | 306 | Y E E E S Y Q R L Q L L I S Q H A L N L S . . . . R E I F L S L A H K I Y K R Q K       |

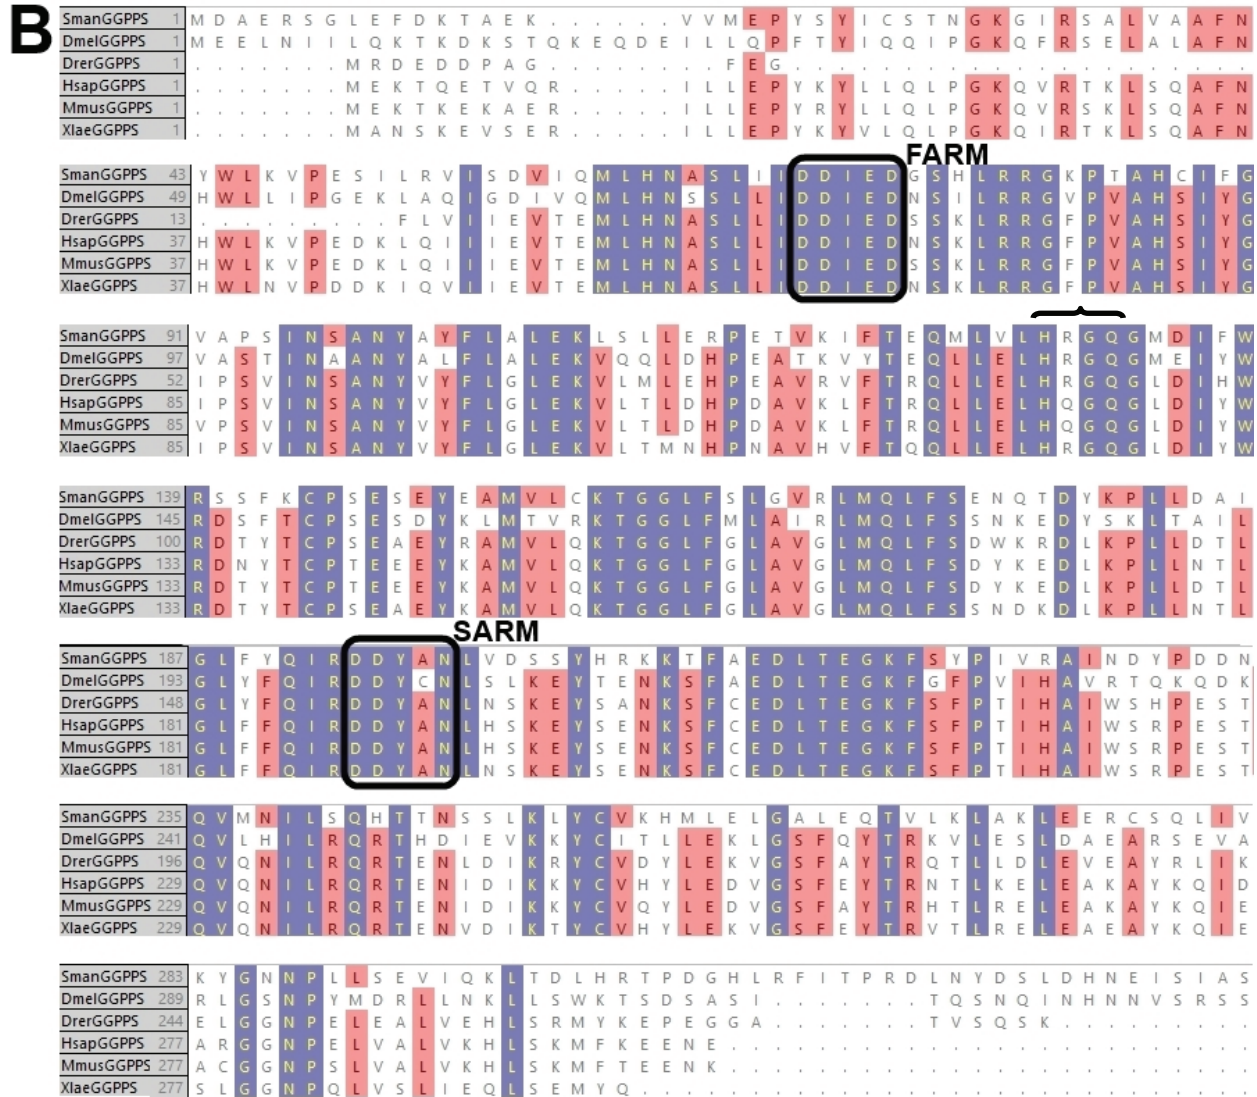

Supplemental FIG. S1: A. Multiple alignment of FPPS proteins. B. Multiple alignment of GGPPS proteins. Protein alignments were done with CLUSTAL W 2.0.12. Multiple alignment results are colored by sequence conserved. The boxed sequences indicate the predicted active sites, first aspartate-rich motif (FARM) and second aspartate-rich motif (SARM), which are highly conserved motifs. Residues determining product chain-length in GGPPS proteins are indicated with a bracket. Accession numbers for the sequences in the alignment are *Xenopus laevis* (Xlae), FPPS: NP\_001084626 and GGPPS: NP\_001091413; *Danio rerio* (Drer), FPPS: AAH83515 and GGPPS: XP\_002664282; *Homo sapiens* (Hsap), FPPS: NP\_001995 and GGPPS: NP\_004828; *Trypanosoma brucei gambiense* (Tbru), FPPS: CBH12431; *Plasmodium vivax* (Pviv), FPPS: XP\_001615401; *Mus musculus* (Mmus), GGPPS:

NP\_034412; *Drosophila melanogaster* (Dmel), FPPS: NP\_477380 and GGPPS: NP\_523958; and  
*Schistosoma mansoni* (Sman), FPPS: CCD78373 and GGPPS: XP\_002573680.]

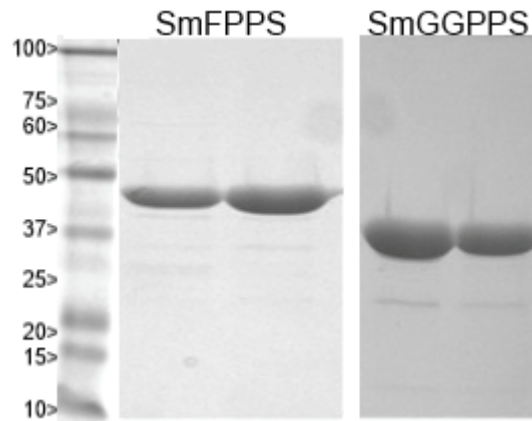

Supplemental FIG. S2: Analysis of purified recombinant *Schistosoma mansoni* FPPS and GGPPS. Recombinant *SmFPPS* and *SmGGPPS* were affinity purified on a nickel-affinity column and samples were analyzed by 16% SDS-PAGE with Coomassie stain. The two samples for each protein are the 300 mM imidazole elution fractions for both protein purifications.

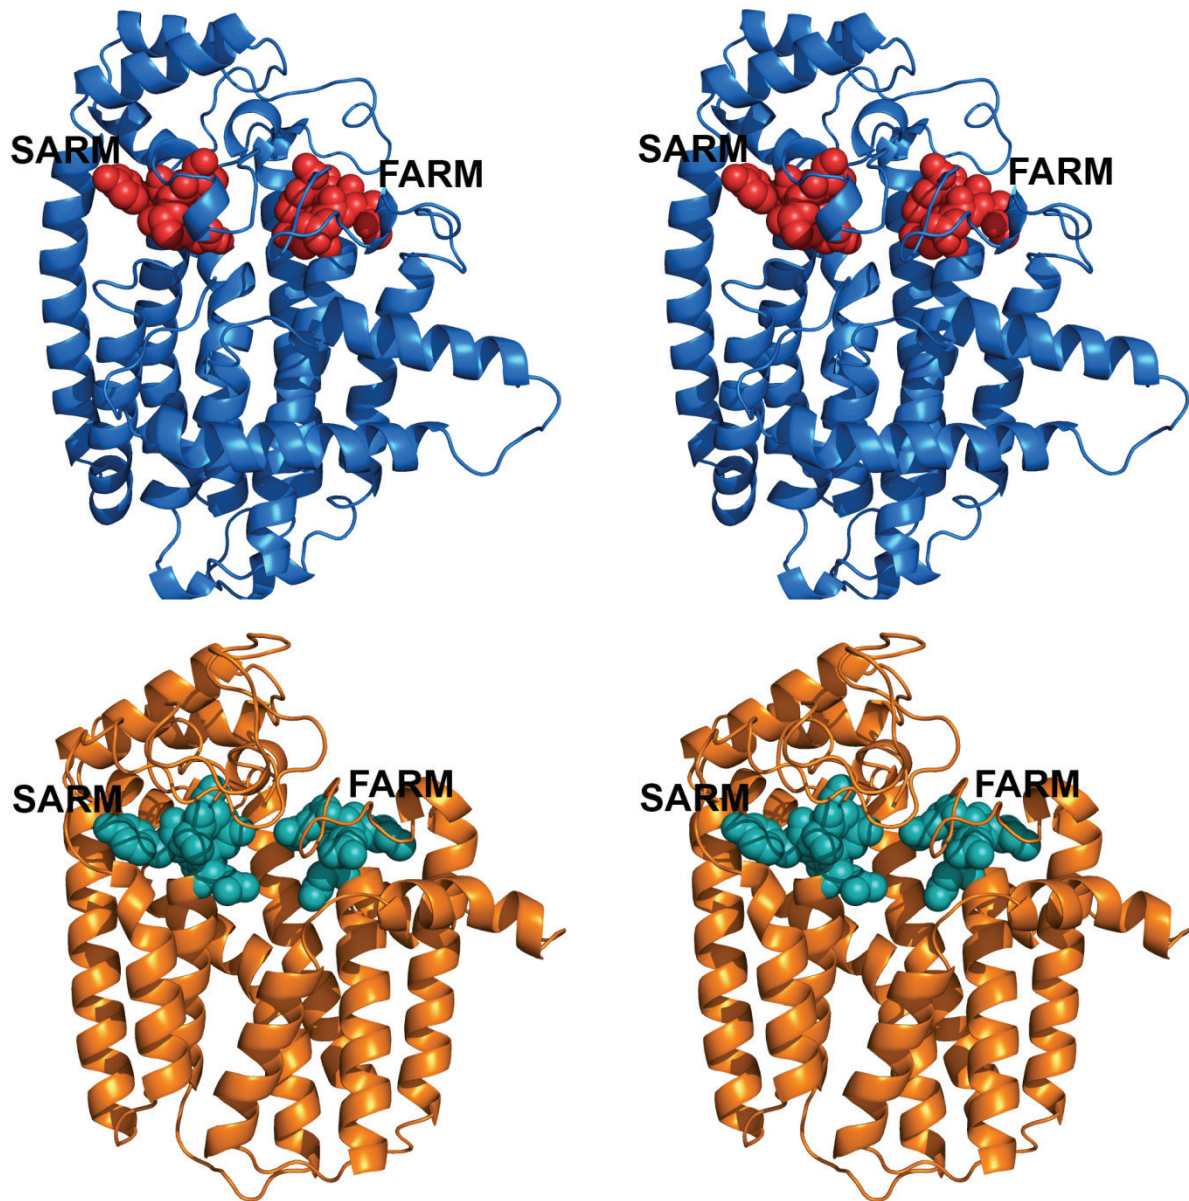

Supplemental FIG. S3: Phyre2 (1) structure prediction for A) *SmFPPS* and B) *SmGGPPS*.

## REFERENCES

1. Kelley LA, Sternberg MJE. 2009. Protein structure prediction on the web: a case study using the Phyre server. *Nature Protocols*. 4:363-371.
